# Supplementary material for: Supplementary force effect of nonlinear energy sink inerter on vortex-induced vibration mitigation in a multiple-span structure
Source: Research Square preprint supplement (doi:10.21203/rs.3.rs-4268413/v1), 2024-04-29
Supplement: Supplementary file 1 [file 12598c93c84b95824dabcabe.docx]

**Highlights (for review)**

1. The universal models for the NESI-beam system accounting for the effects of weight under VIV is established and numerically solved.

2. The sensitivity of vortex-induced vibration (VIV) and harmonic forced vibration (HFV) to weight effects is identified.

3. The VIV reduction ratio is used to assess the impact of weight effects on VIV control performance.

4. The countermeasures to overcome the degradation of VIV control performance caused by weight effects are proposed and analyzed.
